# Supplementary figures and images for: Resveratrol Suppresses Colitis and Colon Cancer Associated with Colitis
Source: Oxford University Press journal article supplement (doi:10.1158/1940-6207.capr-09-0117), 2010-03-23

## Supplementary Figure 2

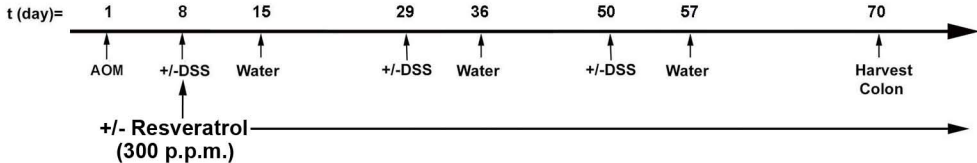

Supplement: 19406207capr090117-sup-sfi_g2.pdf [file 19406207capr090117-sup-sfi_g2.pdf]

# Supplementary Figure 1

$\pm$  Resveratrol (75, 150, 300 p.p.m.)

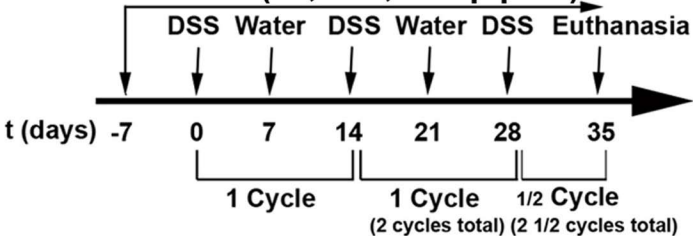

Supplement: 19406207capr090117-sup-sfig_1.pdf [file 19406207capr090117-sup-sfig_1.pdf]

# Supplementary Figure 3

**A.**                      **AOM + DSS**                      **AOM + DSS + Res**

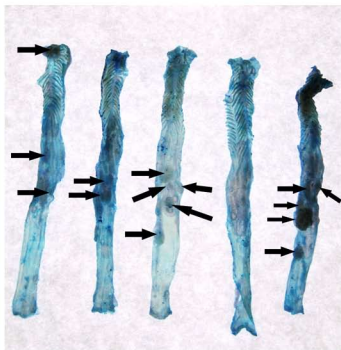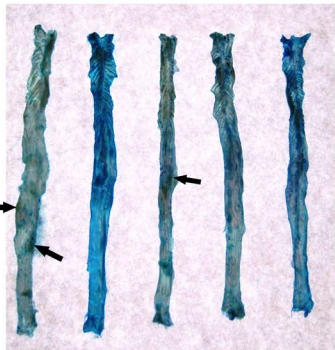

**B.**

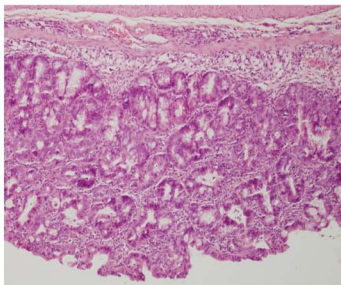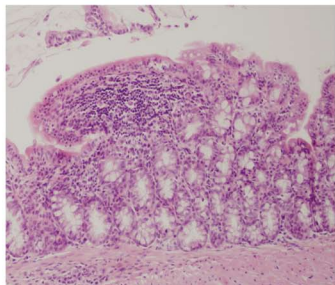

Supplement: 19406207capr090117-sup-sfig_3.pdf [file 19406207capr090117-sup-sfig_3.pdf]
